# Supplementary material for: Effects of Tillage Systems on the Physical Properties of Soils in a Semi-Arid Region of Morocco
Source: MDPI journal article supplement (doi:10.3390/agriculture13030683), 2023-03-15
Supplement: s1 [file s1]

Archive with 1 entries (1 files):
- agriculture-2116735-supplementary.pdf
